# Supplementary material for: Root transcriptional dynamics induced by beneficial rhizobacteria and microbial immune elicitors reveal signatures of adaptation to mutualists
Source: PubMed Central journal article supplement (PMC5765484; doi:10.1111/tpj.13741), 2017-11-15
Supplement: TPJ-93-166-s002.pdf [file TPJ-93-166-s002.pdf]

**Supplemental Table 1: List of primers used in this study**

| <b>Primer name</b>  | <b>Gene</b> | <b>Primer sequence</b>         |
|---------------------|-------------|--------------------------------|
| <i>PP2AA3_Fw</i>    | At1g13320   | 5'-TAACGTGGCCAAAATGATGC-3'     |
| <i>PP2AA3_Rev</i>   | At1g13320   | 5'-GTTCTCCACAACCGCTTGGT-3'     |
| <i>CYP71A12_Fw</i>  | At2g30750   | 5'-GATTATCACCTCGGTTCT-3'       |
| <i>CYP71A12_Rev</i> | At2g30750   | 5'-CCACTAATACTCCCAGATTA-3'     |
| <i>MYB51_Fw</i>     | At1g18570   | 5'-ACAAATGGTCTGCTATAGCT-3'     |
| <i>MYB51_Rev</i>    | At1g18570   | 5'-CTTGTGTGTAAGTGGATCAA-3'     |
| <i>SRO4_Fw</i>      | At3g47720   | 5'-TTGGAGCACACACATGAACA-3'     |
| <i>SRO4_Rev</i>     | At3g47720   | 5'-CCAAGGAGATTTTCGGGTTTT-3'    |
| <i>SAD6_Fw</i>      | At1g43800   | 5'-TCTTCTCAAACCCGTTGACC-3'     |
| <i>SAD6_Rev</i>     | At1g43800   | 5'-CTTCCCTCAGCTCACGAAC-3'      |
| <i>JAZ8_Fw</i>      | At1g30135   | 5'-TGTGTTTTTCTTCAGATGTTACCC-3' |
| <i>JAZ8_Rev</i>     | At1g30135   | 5'-TCTCTGCTTGCGATCGATATT-3'    |
| <i>WRKY30_Fw</i>    | At5g24110   | 5'-AGAGCGATGATTCCGATCAAG-3'    |
| <i>WRKY30_Rev</i>   | At5g24110   | 5'-CATCGTCCAGCGTTCTATCAA-3'    |
| <i>MYB72_Fw</i>     | At1g56160   | 5'-ACGAGATCAAAAACGTGTGGAAC-3'  |
| <i>MYB72_Rev</i>    | At1g56160   | 5'-TCATGATCTGCTTTTGTGCTTTG-3'  |
| <i>IRT1_Fw</i>      | At4g19690   | 5'-ACCCGTGCGTCAACAAAGCTAAAG-3' |
| <i>IRT1_Rev</i>     | At4g19690   | 5'-TCCCGGAGGCGAAACACTTAATGA-3' |
| <i>GH3.3_Fw</i>     | At2g23170   | 5'-CATCACAGAGTTCCTCACAAGC-3'   |
| <i>GH3.3_Rev</i>    | At2g23170   | 5'-GTCGGTCCATGTCTTCATCA-3'     |
